# Supplementary material for: Increased Expression and Activation of FAK in Small-Cell Lung Cancer Compared to Non-Small-Cell Lung Cancer
Source: PubMed Central journal article supplement (PMC6827365; doi:10.3390/cancers11101526), 2019-10-10
Supplement: cancers-11-01526-s001.pdf [file cancers-11-01526-s001.pdf]

# Supplementary Materials: Increased Expression and Activation of FAK in Small-Cell Lung Cancer Compared to Non-Small-Cell Lung Cancer

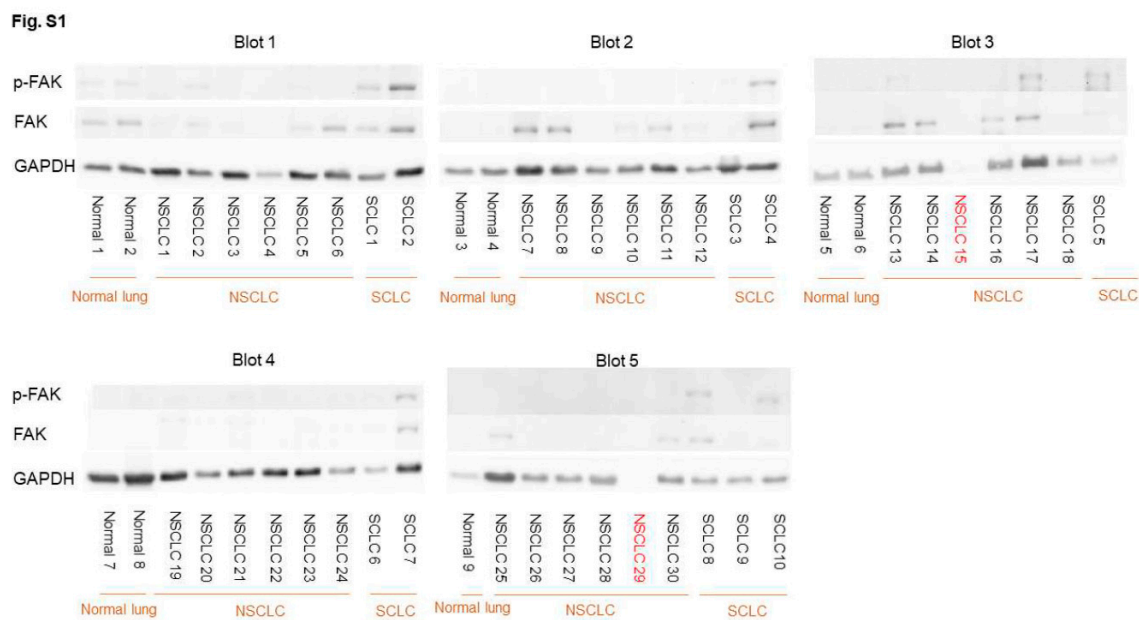

Figure S1. Western blot.
